# Supplementary material
Source: publisher site journal article supplement (http://static.cambridge.org/content/id/urn:cambridge.org:id:article:S1355617719000274/resource/name/S1355617719000274supp001.docx)
Supplement: Supplementary file 1 [file S1355617719000274supp001.docx]

**Supplemental Materials**

| **Table S.1** Regions and peak coordinates for gray matter thickness decreases with age | | | | |
| --- | --- | --- | --- | --- |
| Region | Cluster Size | Talairach Coordinates | | |
|  |  | X | Y | Z |
| **Left Hemisphere** |  |  |  |  |
| Pars Opercularis | 16317 | -41 | 7 | 10 |
| Medial Superior Frontal Gyrus | 5921 | -9 | -3 | 48 |
| Medial Superior Frontal Gyrus | 467 | -11 | 26 | 32 |
| Precuneus | 2212 | -21 | -58 | 8 |
| Supramarginal Gyrus | 582 | -57 | -43 | 37 |
| Precuneus | 547 | -14 | -53 | 33 |
| Orbitofrontal Gyrus | 208 | -19 | 24 | -19 |
| Posterior Cingulate Gyrus | 229 | -6 | -34 | 34 |
| Fusiform Gyrus | 1530 | -29 | -72 | -13 |
| Inferior Parietal Lobule | 682 | -31 | -58 | 37 |
| Inferior Temporal Gyrus | 637 | -43 | -13 | -34 |
| Superior Frontal Gyrus | 286 | -21 | 11 | 49 |
| Precentral Gyrus | 228 | -28 | -15 | 66 |
| Supramarginal Gyrus | 941 | -50 | -28 | 32 |
| Inferior Parietal Lobule | 318 | -32 | -79 | 30 |
| Entorhinal Cortex | 231 | -27 | -8 | -34 |
| Anterior Cingulate Gyrus | 154 | -6 | 38 | -1 |
| Middle Frontal Gyrus | 171 | -38 | 12 | 53 |
| Postcentral Gyrus | 186 | -50 | -12 | 16 |
| Postcentral Gyrus | 123 | -49 | -23 | 58 |
| Superior Temporal Gyrus | 122 | -62 | -47 | 15 |
| Supramarginal Gyrus | 170 | -35 | -35 | 36 |
| Lateral Occipital | 144 | -27 | -86 | 2 |
| Lingual Gyrus | 114 | -11 | -63 | -2 |
| Middle Frontal Gyrus | 66 | -39 | 43 | 21 |
| Inferior Parietal Lobule | 121 | -49 | -63 | 38 |
| Orbitofrontal Gyrus | 38 | -18 | 48 | -14 |
| Superior Parietal Lobule | 36 | -15 | -76 | 45 |
| Middle Frontal Gyrus | 30 | -32 | 16 | 46 |
| Lateral Occipital | 34 | -13 | -94 | -11 |
| Superior Parietal Lobule | 26 | -23 | -60 | 63 |
| Precentral Central | 17 | -36 | -20 | 35 |
| Superior Temporal Gyrus | 25 | -52 | -40 | 15 |
| Cuneus | 23 | -6 | -95 | 13 |
| Precentral Gyrus | 56 | -49 | -6 | 48 |
| Precentral Gyrus | 10 | -30 | -7 | 44 |
| Lateral Occipital | 5 | -19 | -100 | 3 |
|  |  |  |  |  |
| **Right Hemisphere** |  |  |  |  |
| Insula | 7655 | 33 | -25 | 19 |
| Paracentral Lobule | 5454 | 17 | -28 | 37 |
| Posterior Cingulate Gyrus | 2398 | 7 | -52 | 17 |
| Superior Temporal Gyrus | 750 | 46 | -22 | -8 |
| Lingual Gyrus | 591 | 18 | -51 | -4 |
| Posterior Cingulate Gyrus | 179 | 5 | -19 | 28 |
| Pars Orbitalis | 479 | 45 | 43 | -12 |
| Pars Triangularis | 612 | 51 | 26 | 4 |
| Superior Frontal Gyrus | 237 | 20 | 24 | 50 |
| Inferior Parietal Lobule | 206 | 34 | -65 | 43 |
| Pars Opercularis | 402 | 40 | 7 | 22 |
| Supramarginal Gyrus | 261 | 60 | -29 | 40 |
| Lateral Occipital | 140 | 17 | -94 | 15 |
| Middle Frontal Gyrus | 315 | 35 | 21 | 48 |
| Precentral Gyrus | 137 | 59 | 3 | 28 |
| Posterior Cingulate Gyrus | 81 | 5 | -6 | 40 |
| Entorhinal Cortex | 148 | 24 | -8 | -33 |
| Precentral Gyrus | 71 | 35 | -18 | 38 |
| Middle Frontal Gyrus | 106 | 26 | 10 | 45 |
| Orbitofrontal Gyrus | 59 | 21 | 35 | -17 |
| Precentral Gyrus | 53 | 33 | -27 | 46 |
| Middle Frontal Gyrus | 154 | 26 | 43 | 31 |
| Inferior Parietal Lobule | 56 | 50 | -57 | 11 |
| Precentral Gyrus | 85 | 14 | -16 | 66 |
| Precentral Gyrus | 47 | 24 | -13 | 54 |
| Fusiform Gyrus | 53 | 31 | -72 | -13 |
| Pericalcarine | 68 | 16 | -81 | 9 |
| Superior Temporal Gyrus | 80 | 45 | -40 | 1 |
| Supramarginal Gyrus | 113 | 58 | -21 | 27 |
| Fusiform Gyrus | 45 | 32 | -47 | -14 |
| Precentral Gyrus | 38 | 52 | -2 | 46 |
| Insula | 75 | 36 | -3 | -7 |
| Superior Temporal Gyrus | 25 | 67 | -25 | 2 |
| Precuneus | 1 | 16 | -45 | 51 |
| All results presented with FDR-corrected p≤0.05 | | | | |

| **Table S.2** GLM-based analysis of fMRI reading task | | | | | |
| --- | --- | --- | --- | --- | --- |
| Region | Cluster Size | MNI Coordinates | | | Peak T Value |
|  |  | X | Y | Z |  |
| **Reading > Letters** |  |  |  |  |  |
| L Middle Temporal Gyrus | 233 | -57 | -19 | -14 | 10.24 |
|  |  | -57 | -10 | -14 | 9.56 |
|  |  | -51 | -40 | 1 | 7.76 |
| L Precentral Gyrus | 52 | -54 | -7 | 49 | 8.07 |
|  |  | -45 | -4 | 55 | 6.86 |
| R Middle Temporal Gyrus | 27 | 54 | -4 | -26 | 7.77 |
| L Calcarine | 691 | -9 | -91 | -5 | 7.65 |
|  |  | -3 | -91 | 1 | 7.53 |
|  |  | -12 | -55 | 1 | 7.43 |
| L Fusiform | 6 | -30 | -37 | -20 | 5.69 |
| R Cerebellum | 7 | 3 | -61 | -41 | 5.60 |
| L Cerebellum | 3 | -3 | -76 | -32 | 5.56 |
| L Supplementary Motor Area | 1 | -3 | -1 | 64 | 5.38 |
| R Inferior Temporal Gyrus | 1 | 54 | -16 | -17 | 5.32 |
| R Postcentral Gyrus | 1 | -54 | -19 | 55 | 5.32 |
| All results presented with FWE-corrected p≤0.05 | | | | | |
